# Supplementary material for: Chronic Alcohol Consumption Promotes Diethylnitrosamine-Induced Hepatocarcinogenesis via Immune Disturbances
Source: PubMed Central journal article supplement (PMC5451469; doi:10.1038/s41598-017-02887-7), 2017-05-31
Supplement: 41598_2017_2887_MOESM1_ESM.pdf [file 41598_2017_2887_MOESM1_ESM.pdf]

**Chronic Alcohol Consumption Promotes Diethylnitrosamine-Induced  
Hepatocarcinogenesis via Immune Disturbances**

Guoxiu Yan, Xuefu Wang, Cheng Sun, Xiaodong Zheng, Haiming Wei, Zhigang Tian,  
and Rui Sun

**Inventory of Supplementary Information**

**Supplementary Figure 1. Protocol used for studying the promotion of DEN-  
induced HCC by ethanol.**

**Supplementary Table 1. Primer sequences for genes.**

## Protocol

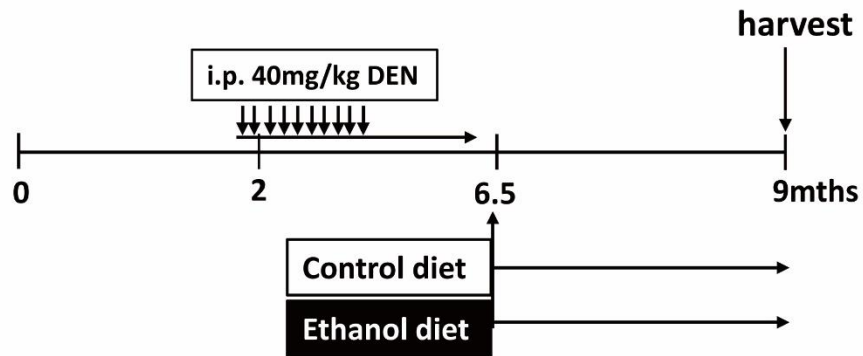

**Supplementary Figure 1. Protocol used for studying the promotion of DEN-induced HCC by ethanol.** Male mice (approximately 2 months old) were weighed and injected with DEN (40 mg/kg body weight [BW] intraperitoneally [i.p.] dissolved in saline every 4 days for a total of 10 times. Then, mice (approximately 6.5 months old) were randomly divided into two groups: ethanol groups were fed a liquid diet containing 5% (V/V) ethanol for 2.5 months, whereas control groups were pair-fed a control diet for 2.5 months. Mice were weighed and sacrificed after 7 months of DEN treatment. The description in detail of experiment was seen in material and methods.

| RT-PCR set    | Forward primer           | Reverse primer           |
|---------------|--------------------------|--------------------------|
| Bcl-xl        | TGAGCAGGTAGTGAATGAAC     | TAGGTGGTCATTCAGATAGG     |
| DGAT          | TGGTGTGTGGTGATGCTGATC    | GCCAGGCGCTTCTCAA         |
| TIMP1         | CTTGTTCCCTGGCGTACTC      | ACCTGATCCGTCCACAAACAG    |
| col1a1        | GAAACCCGAGGTATGCTTGA     | GACCAGGAGGACCAGGAAGT     |
| MMP2          | TTTGCTCGGGCCTTAAAAGTAT   | CCATCAAACGGGTATCCATCTC   |
| $\alpha$ -SMA | CTGACAGAGGCACCACTGAA     | GAAGGAATAGCCACGCTCAG     |
| GFAP          | AGAAAACCGCATCACCATT      | TCACATCACCACGTCTTGT      |
| E-cadherin    | ACTGTGAAGGGACGGTCAAC     | GGAGCAGCAGGATCAGAATC     |
| snail         | CCACTGCAACCGTGCTTTT      | TCTTCACATCCGAGTGGGTTT    |
| MMP9          | ACTCACACGACATCTTCCAG     | AGAAGGAGCCCTAGTTCAAG     |
| CD206         | CAGGTGTGGGCTCAGGTAGT     | TGTGGTGAGCTGAAAGGTGA     |
| IL-4          | AGATGGATGTGCCAAACGTCCTCA | AATATGCGAAGCACCTTGAAGCC  |
| IL-10         | GGTTGCCAAGCCTTATCGGA     | ACCTGCTCCACTGCCTTGCT     |
| TGF-beta 1    | AAGTTGGCATGGTAGCCCTT     | GCCCTGGATACCAACTATTGC    |
| IL-12 p35     | AAGACATCACACGGGACCAAAA   | CAGGCAACTCTCGTTCTTGTGTA  |
| IL-6          | GATGCTACCAAACTGGATATAATC | GGTCCTTAGCCACTCCTTCTGTG  |
| IL-17A        | GCTCCAGAAGGCCCTCAGA      | AGCTTCCCTCCGATTGA        |
| CCL2          | GTTGGCTCAGCCAGATGCA      | AGCCTACTCATTGGGATCATCTTG |
| CCL22         | ACTTCAGACCTCCGATGCA      | TGTAGTCCTGGCAGCAGATACT   |
| CXCL2         | CTCTCAAGGGCGGTCAAAAAGTT  | TCAGACAGCGAGGCACATCAGGTA |

**Supplementary Table 1. Primer sequences for genes.**

Detailed primer information for the mouse genes analyzed by Q-PCR.
